# Supplementary material
Source: PubMed Central journal article supplement (PMC3746519)
Supplement: NIHMS489638-supplement-07.pdf [file NIHMS489638-supplement-07.pdf]

Figure 1s

Ngn3<sup>+/+</sup>

Ngn3<sup>-/-</sup>

E14.5 (11 slices)

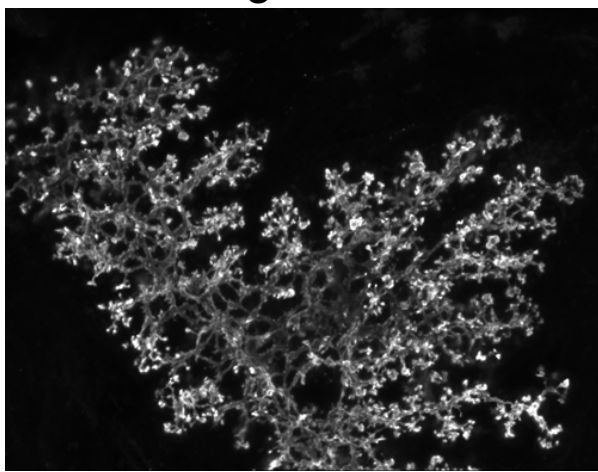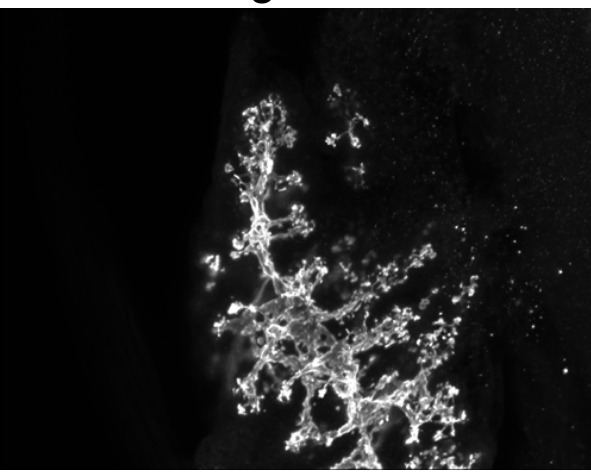

E14.5 (4 slices)

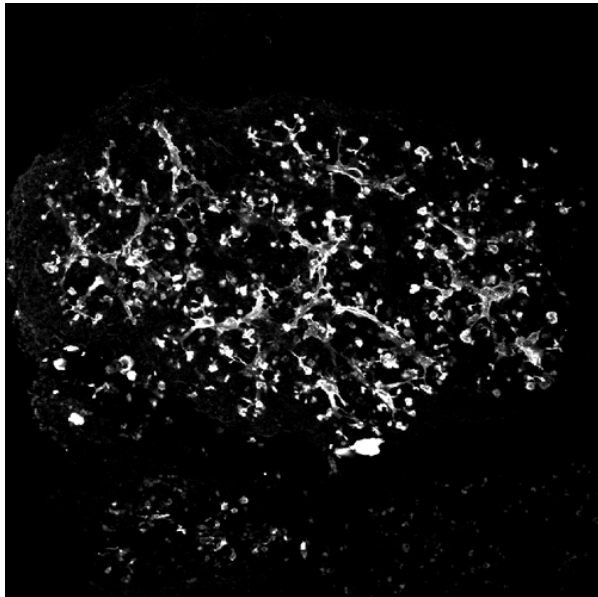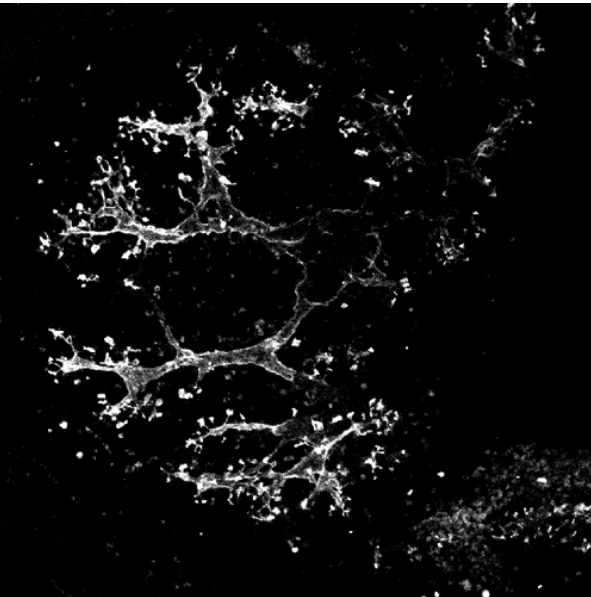

E15.5 (4 slices)

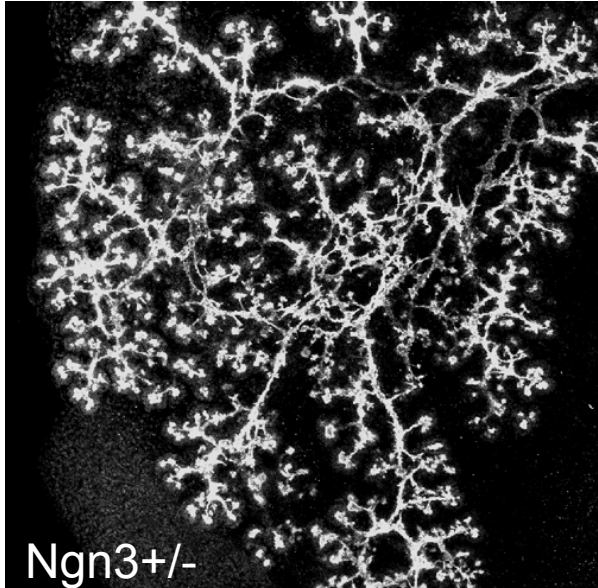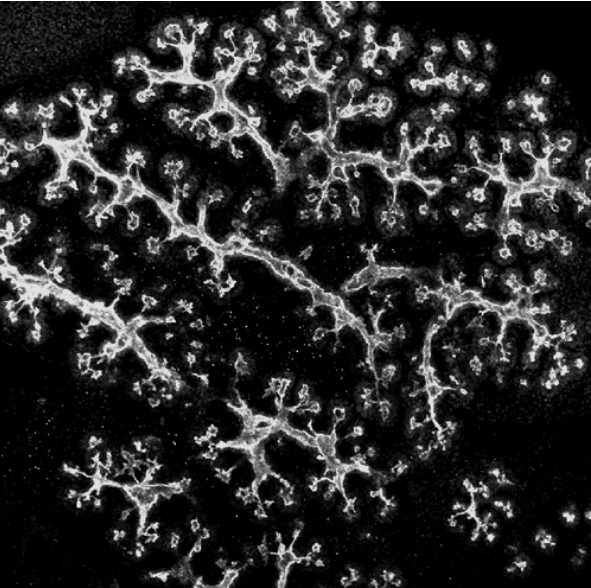

**Figure 2s**

**A**

**Ngn3<sup>+/+</sup>**

**E15.5**

**Ngn3<sup>-/-</sup>**

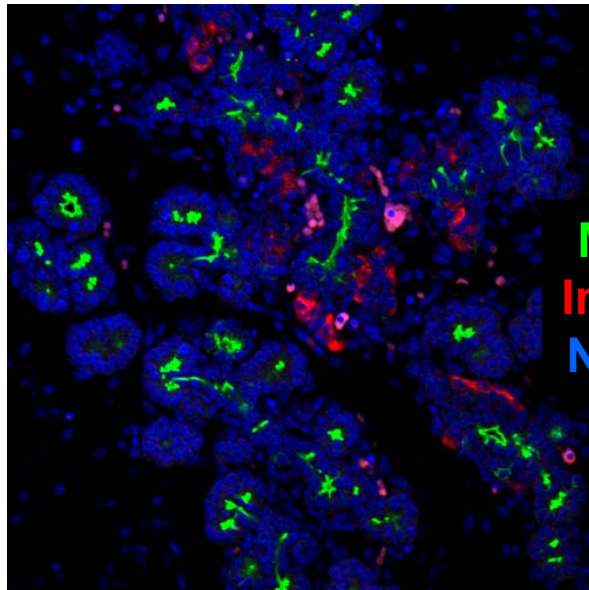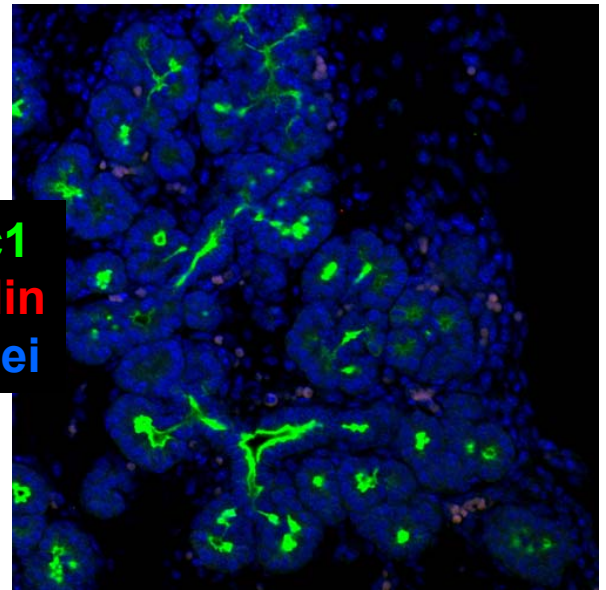

**Muc1**  
**Insulin**  
**Nuclei**

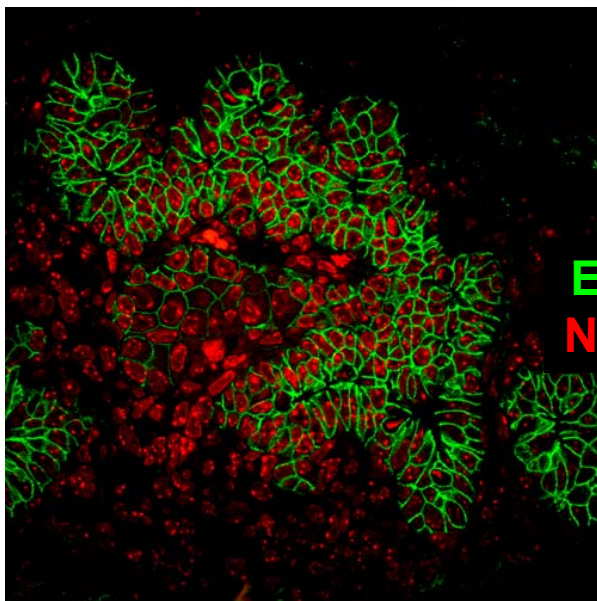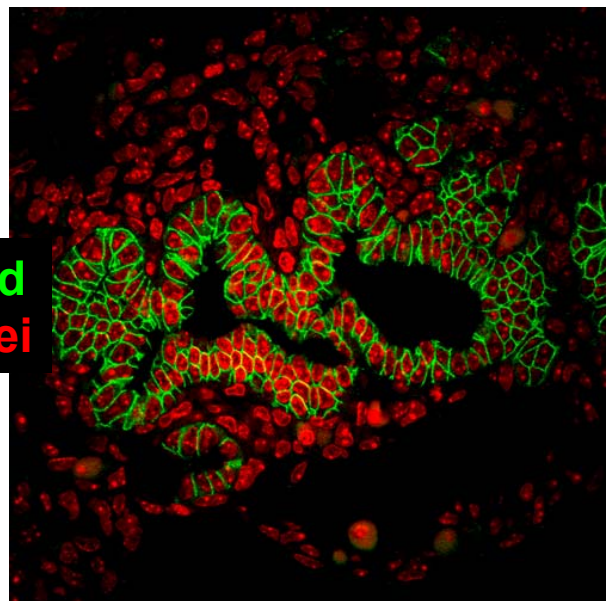

**E-cad**  
**Nuclei**

**Figure 2s**

**B**

**Ngn3<sup>+/+</sup>**

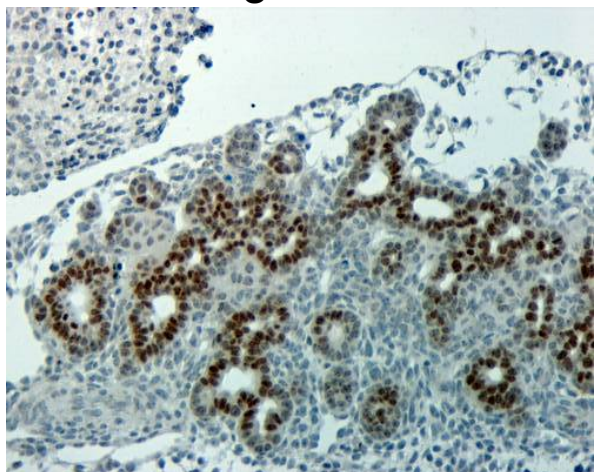

**Hnf1 $\beta$**

**Ngn3<sup>-/-</sup>**

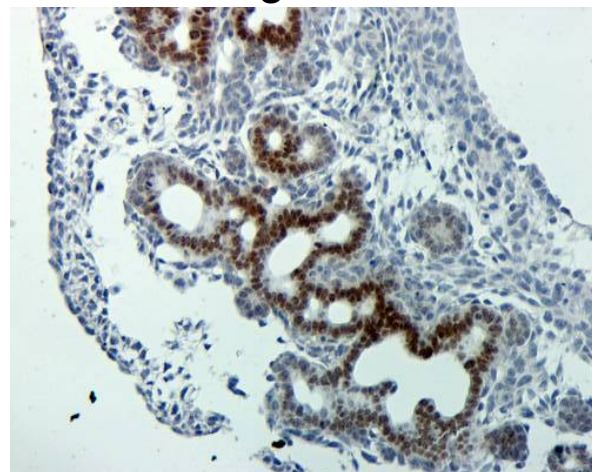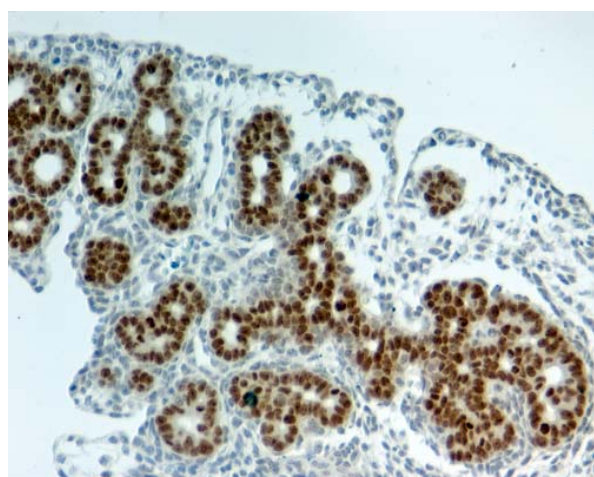

**Hnf-6**

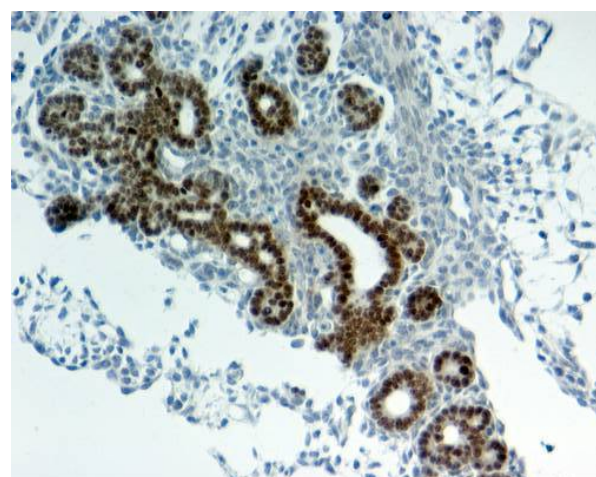

Figure 2s

C

**Ngn3<sup>+/-</sup>**

**Ngn3<sup>-/-</sup>**

**Ptf1a** **Muc1** **Nuclei**

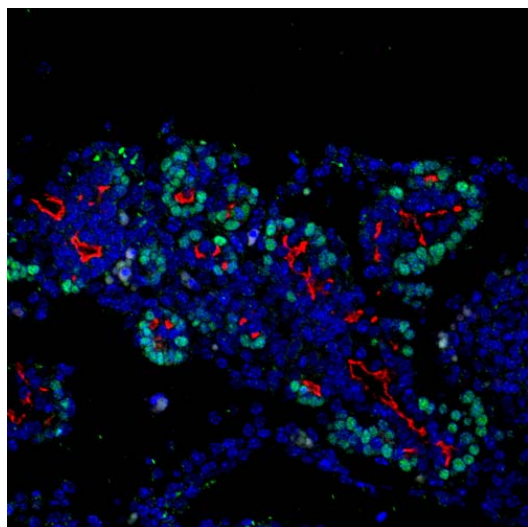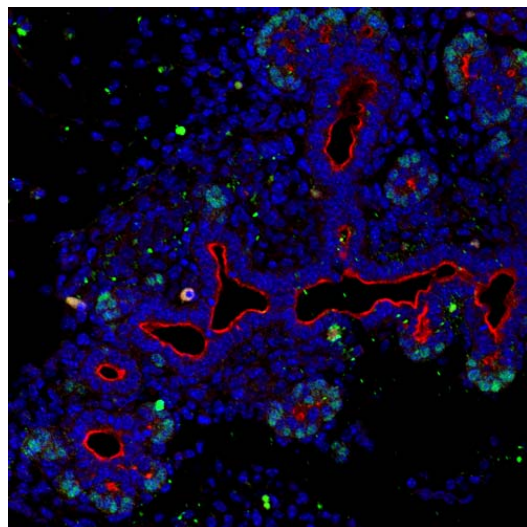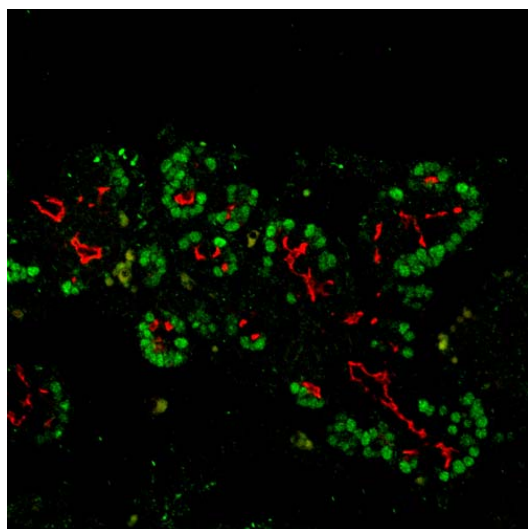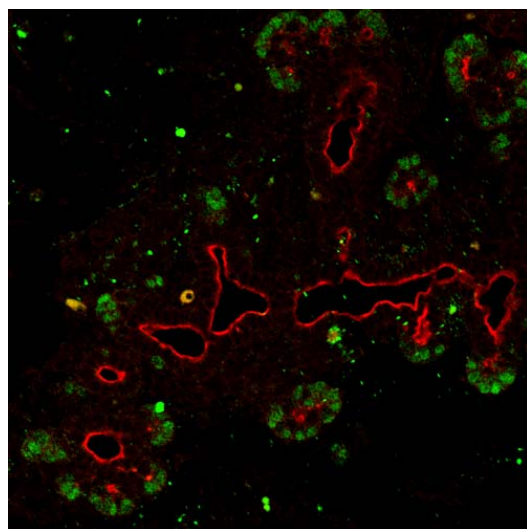

**Nkx6.1** **Muc1**

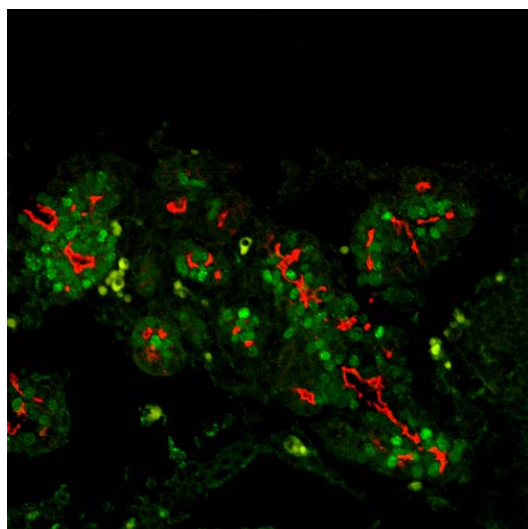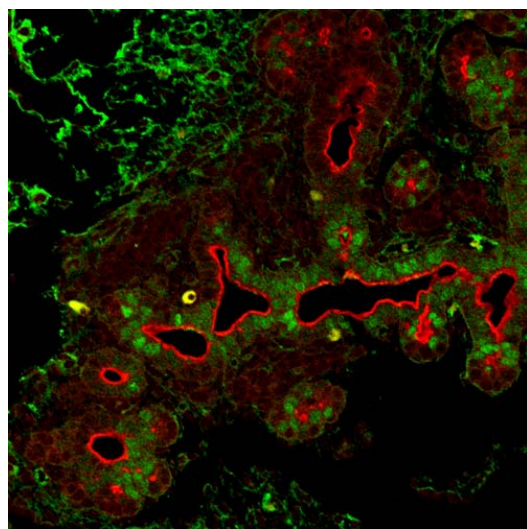

Figure 2s

D

**Ngn3 +/-**

**Ngn3 -/-**

**Pdx1 Muc1 Cpa1**

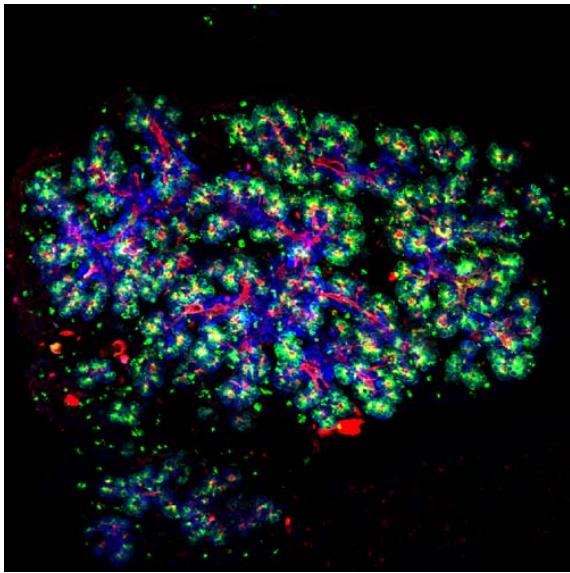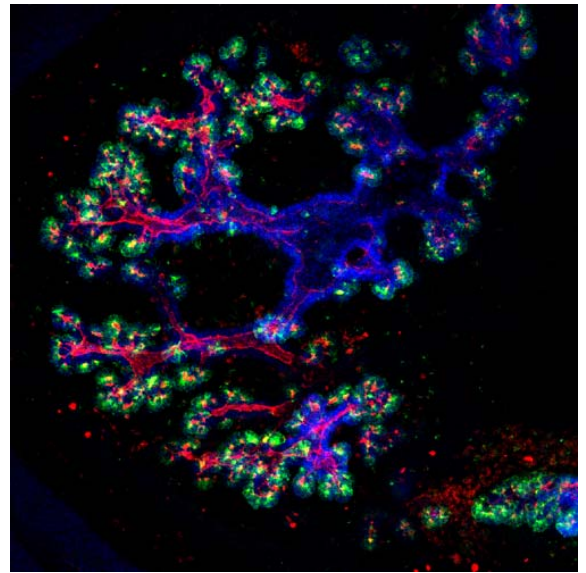

**Cpa1**

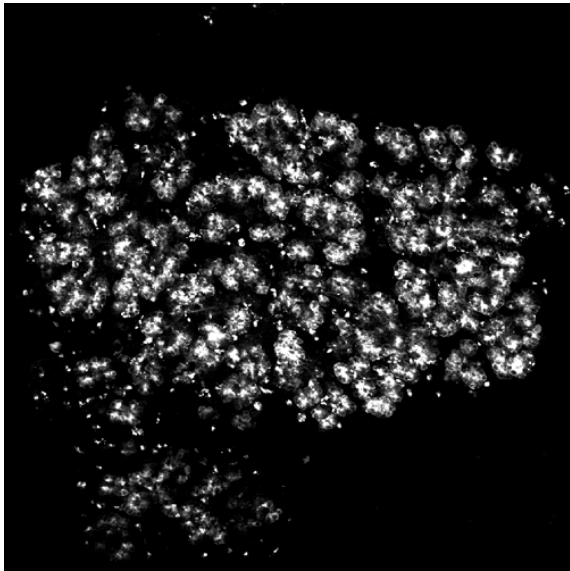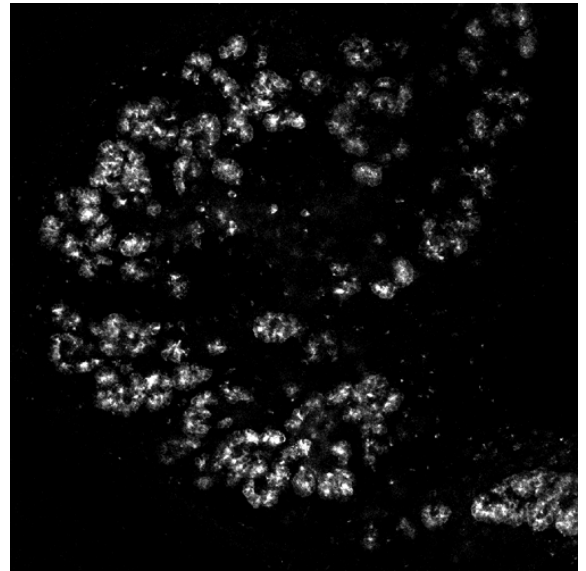

**Muc1**

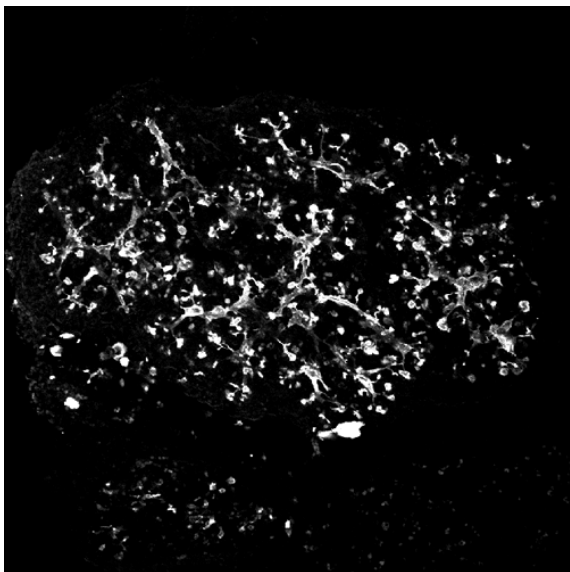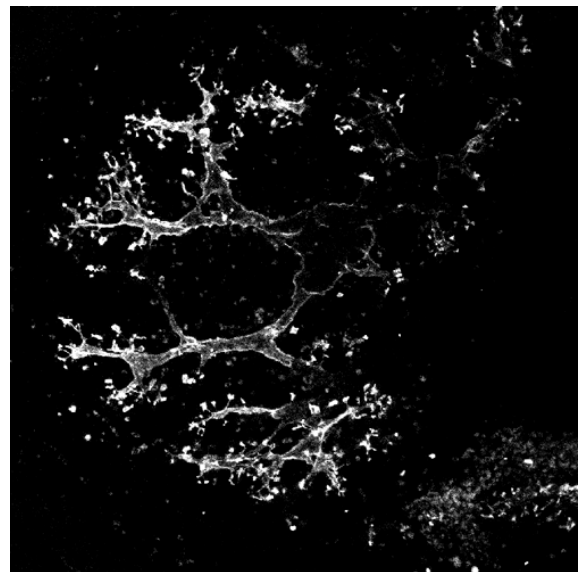

Figure 2s

E

Ngn3 +/+

Ngn3 -/-

Pdx1 Collagen type IV Ins

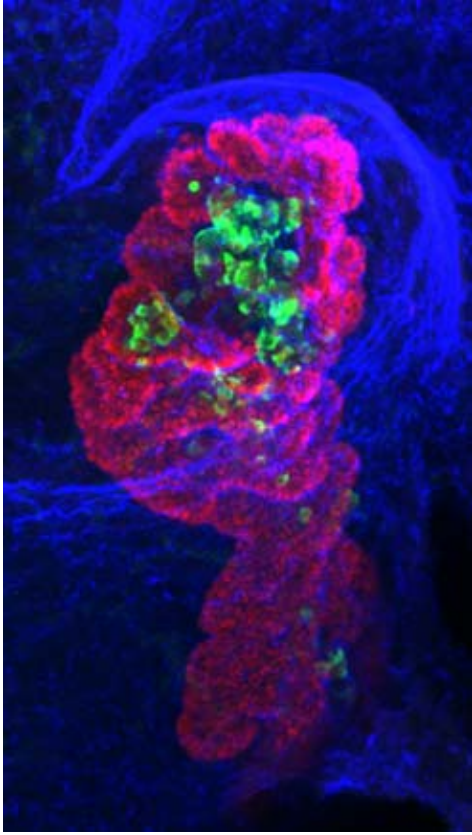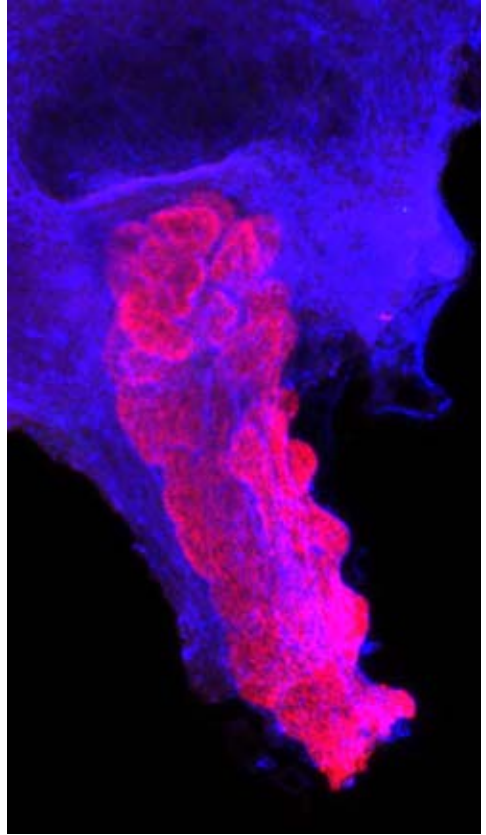

Muc1

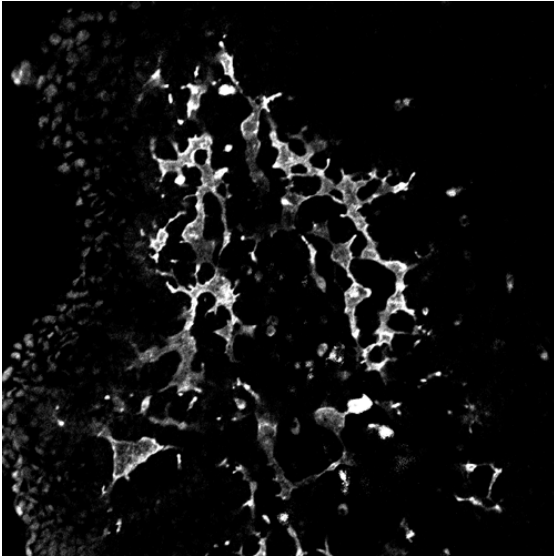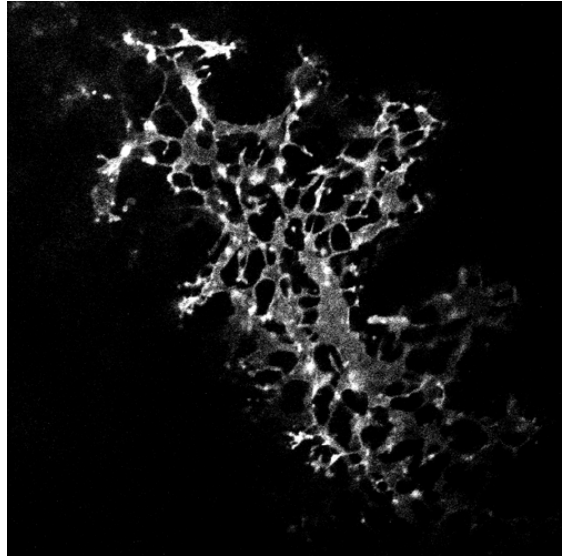

Figure 3s

A

Ngn3 +/+

Ngn3 -/-

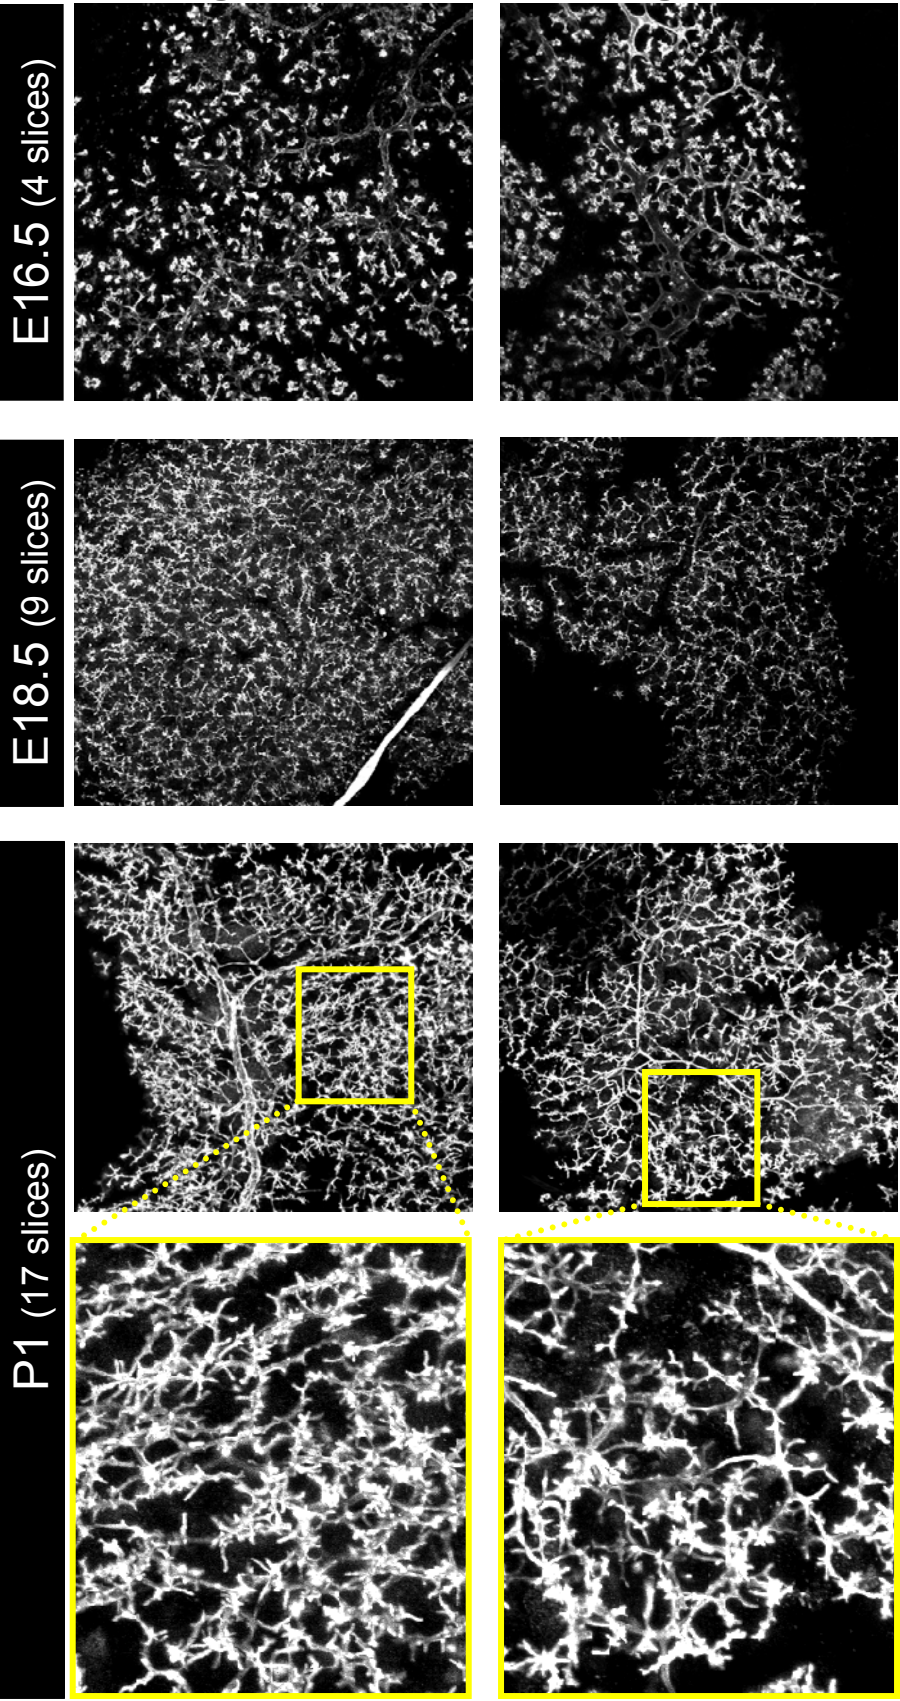

B

Network density

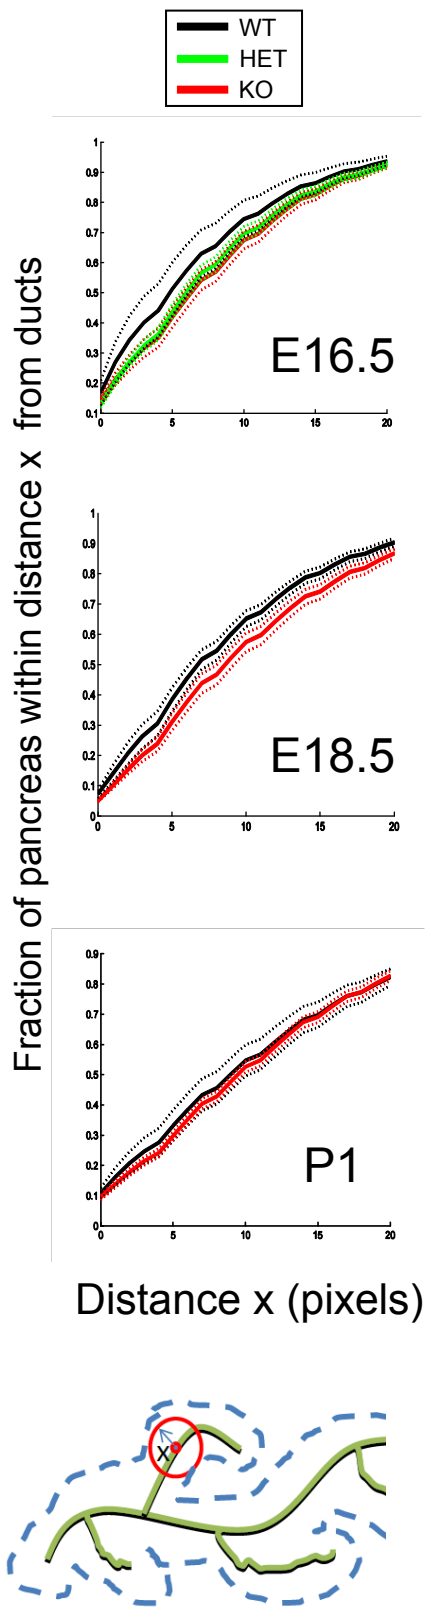

Figure 4s

A

(stack 11 slices)

(stack 5 slices)

WT

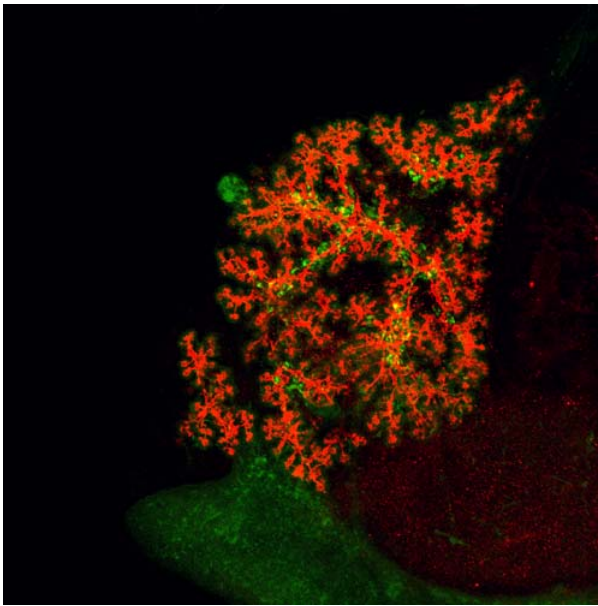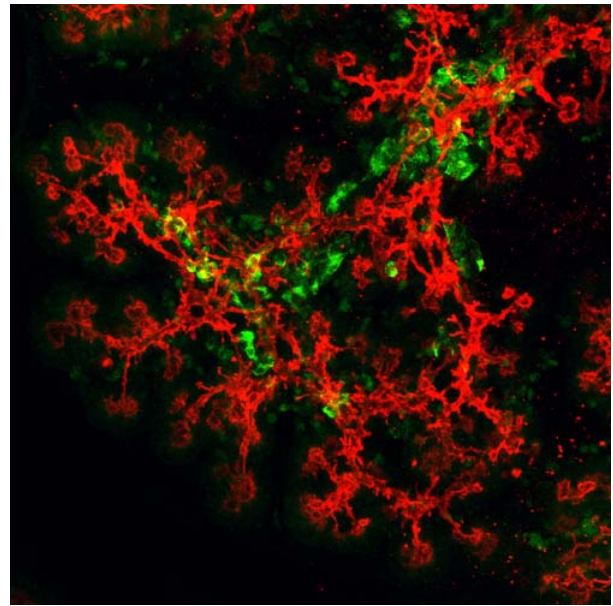

Pax4 -/-

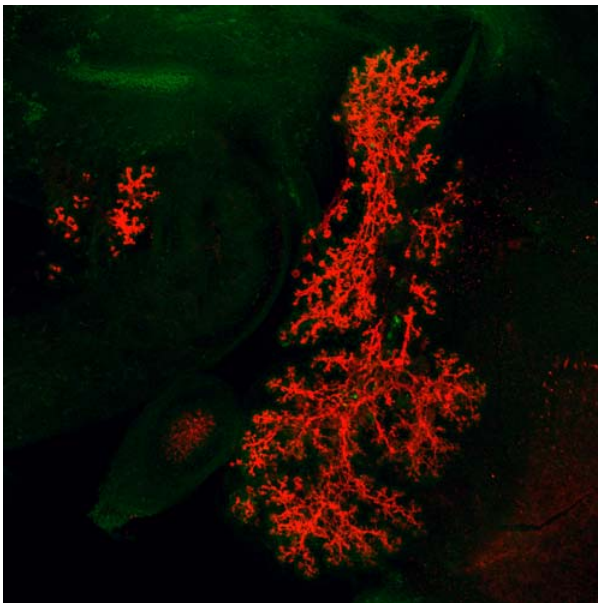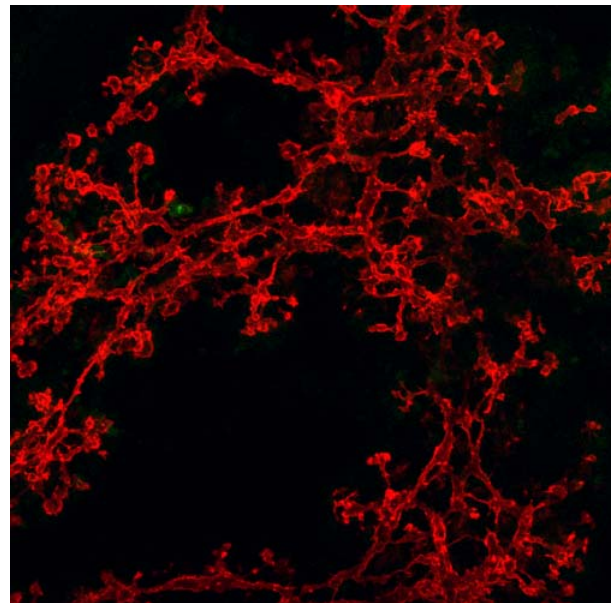

Muc1  
Insulin



Figure 4s

B  
(stack 11 slices)

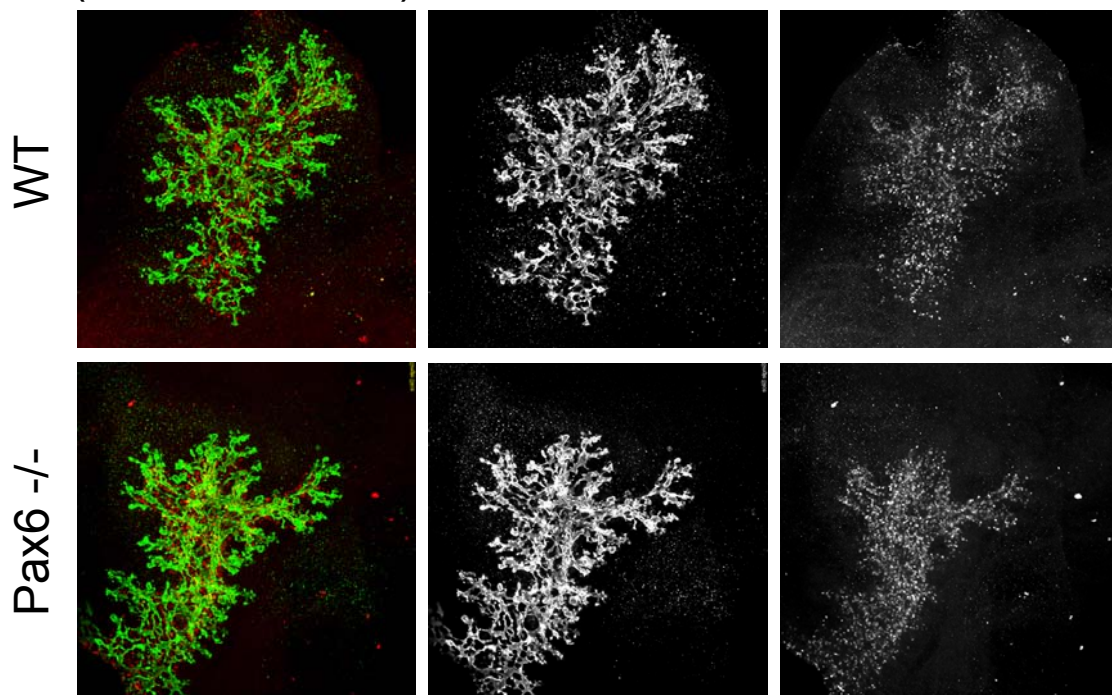

**Muc1**  
**Ngn3**

Muc1

Ngn3

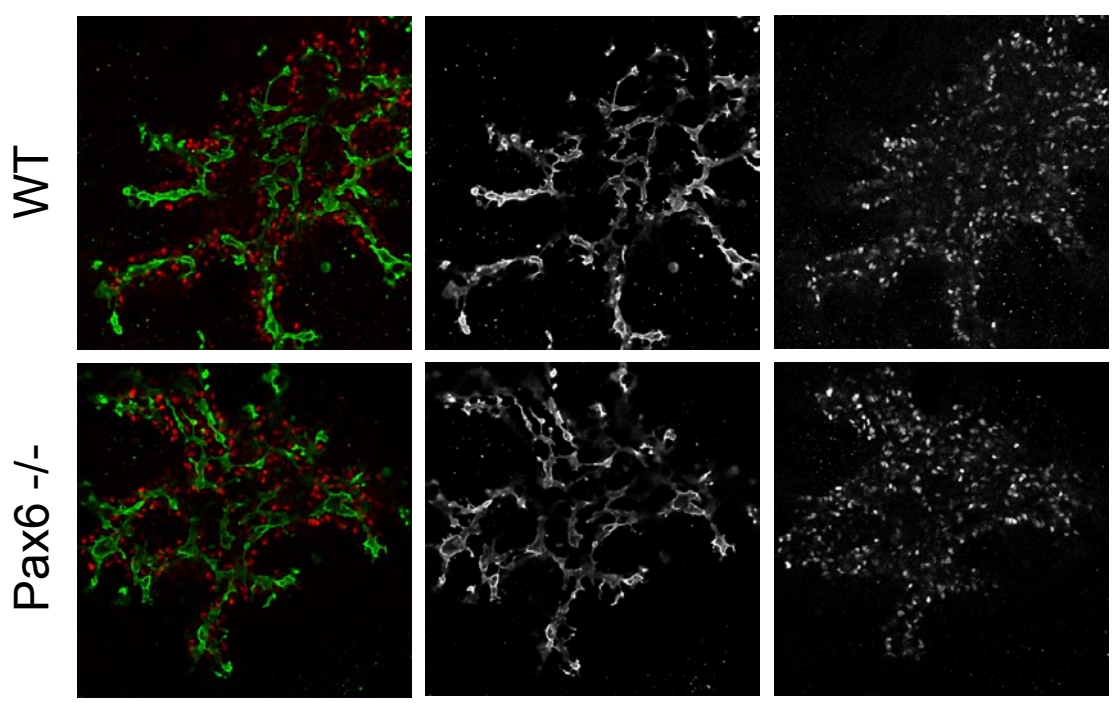

One slice

Figure 5s

Control

LY 411575

Ngn3

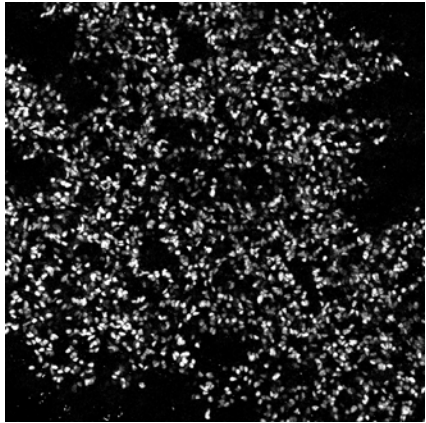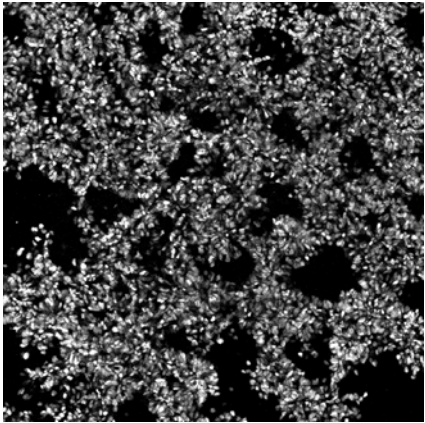

Muc1

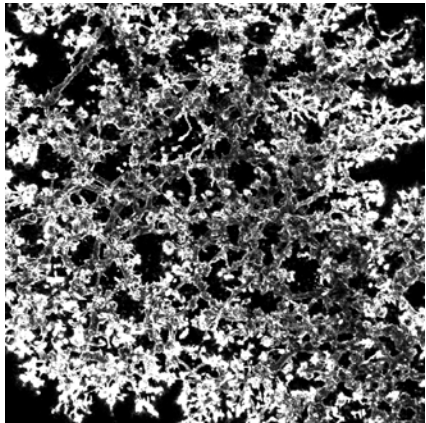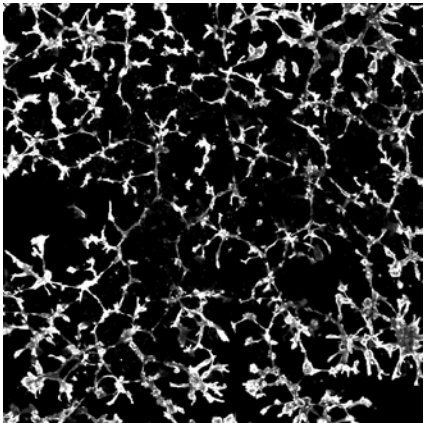

18hs

Cpa1

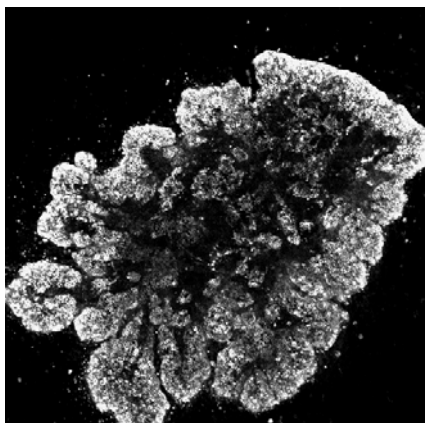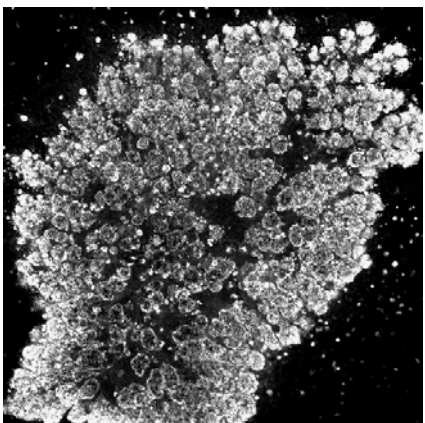

Muc1

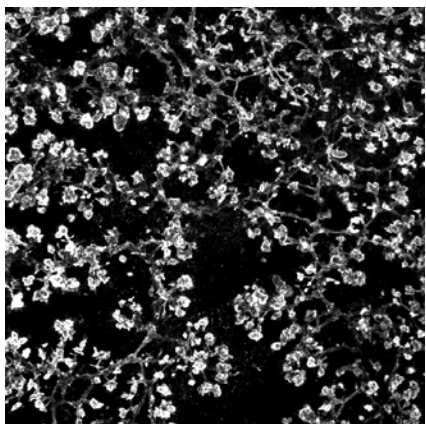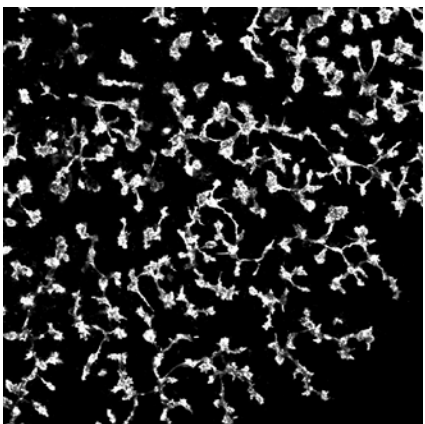

42hs

Figure 6s

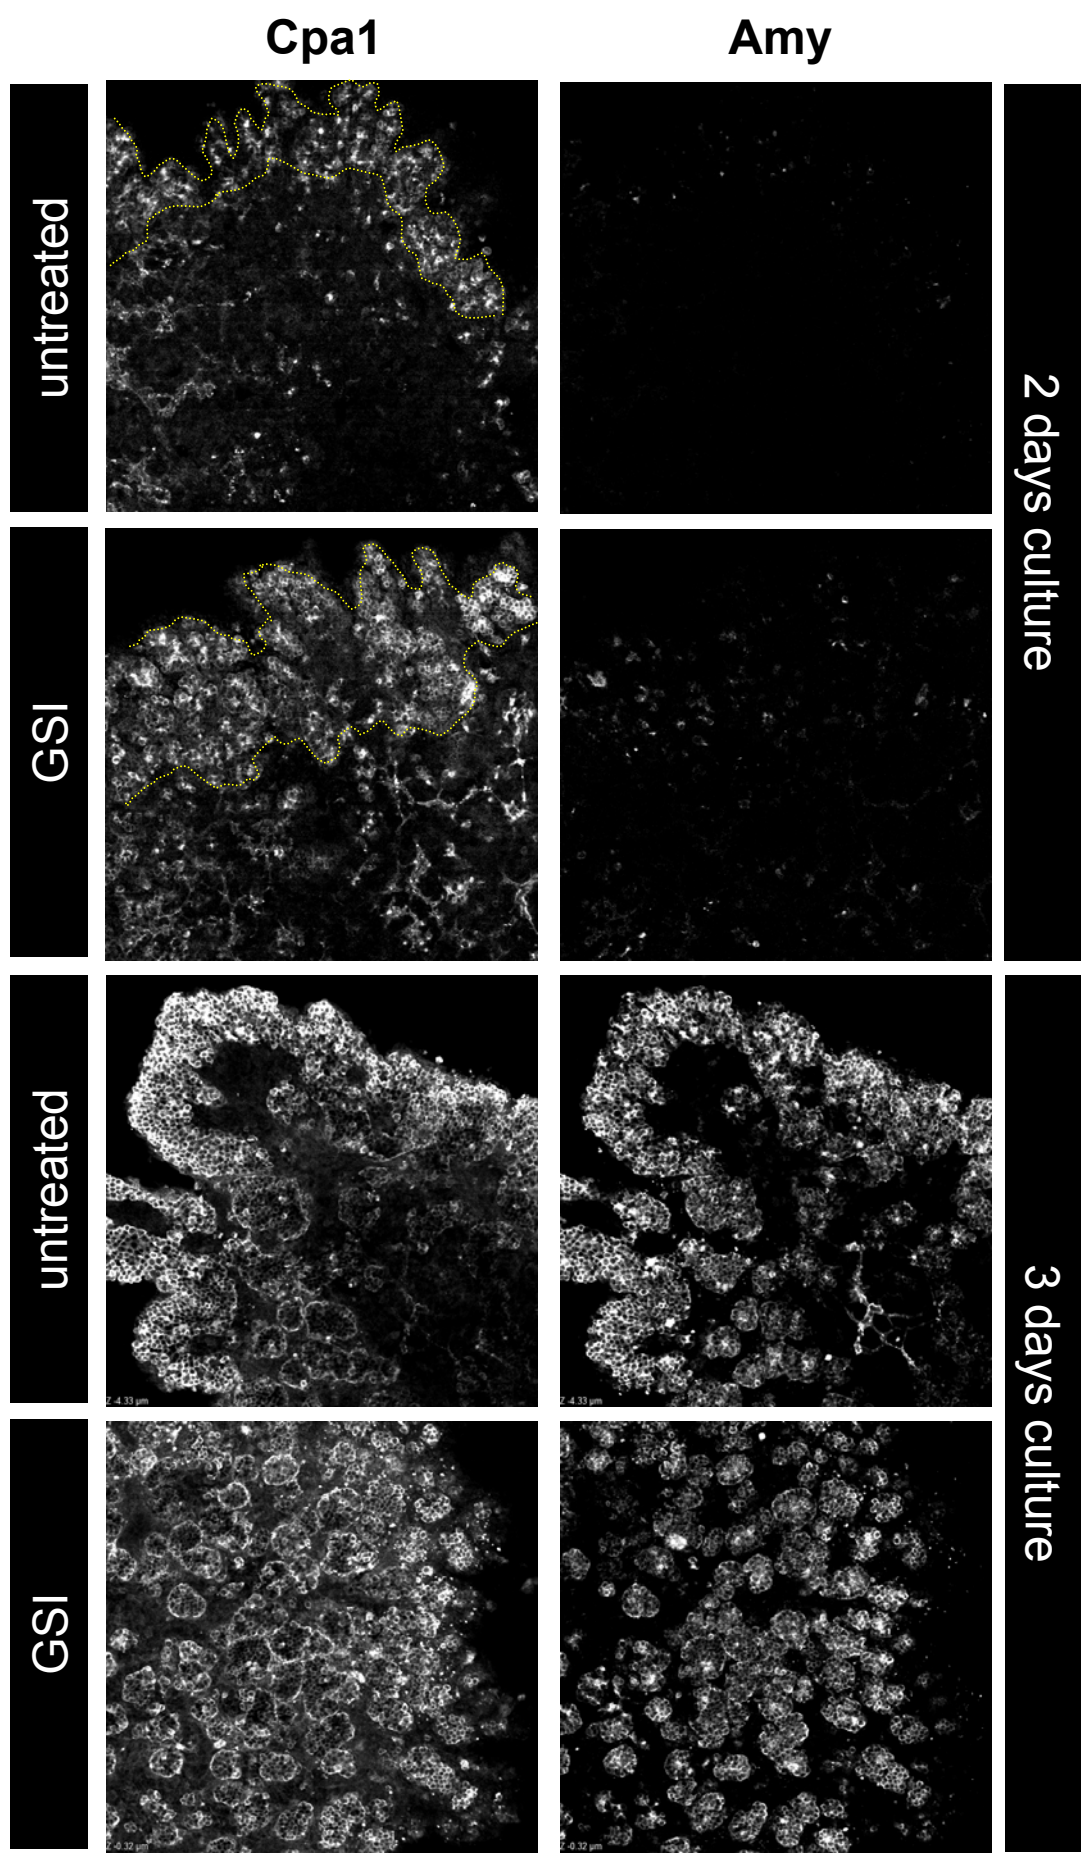

Figure 7s

control

GSI

Muc1  
Ngn3  
Insulin

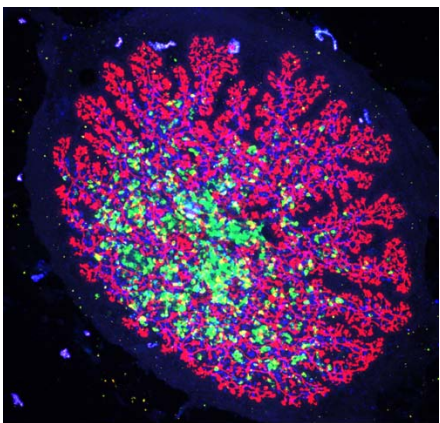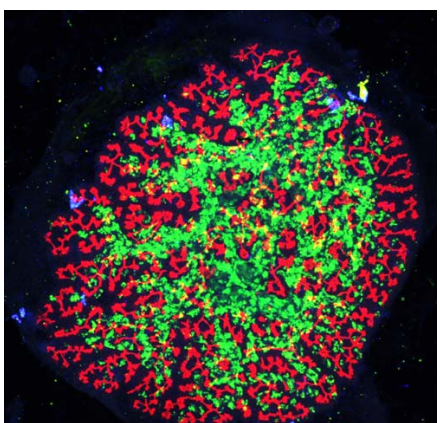

Ngn3

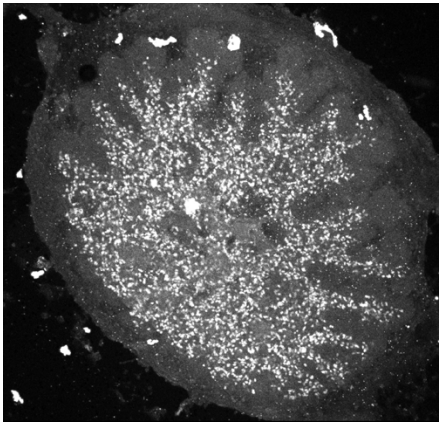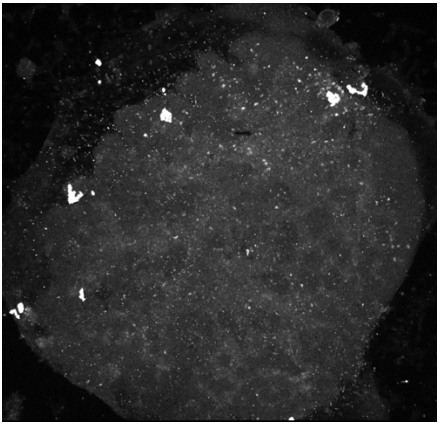

Muc1

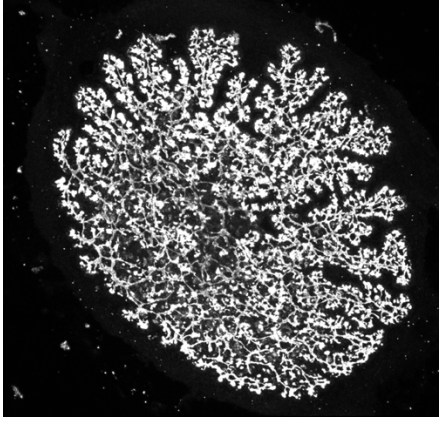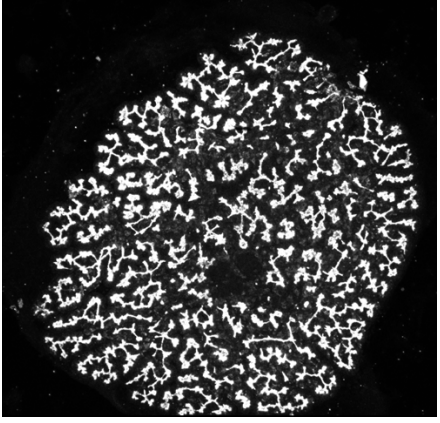

Insulin

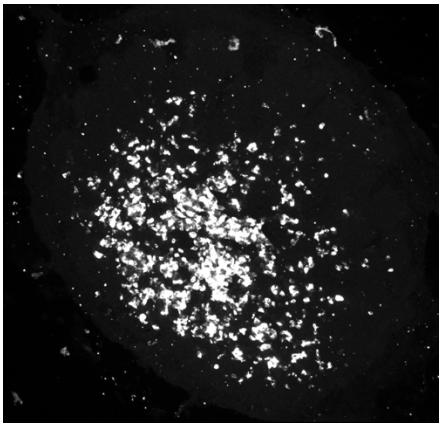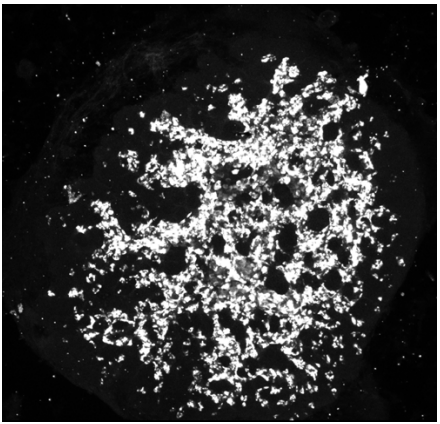

Figure 8s

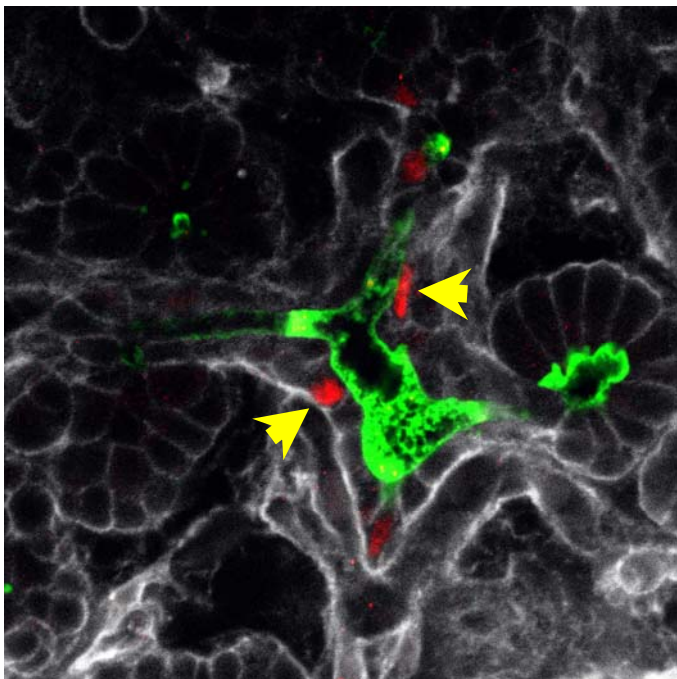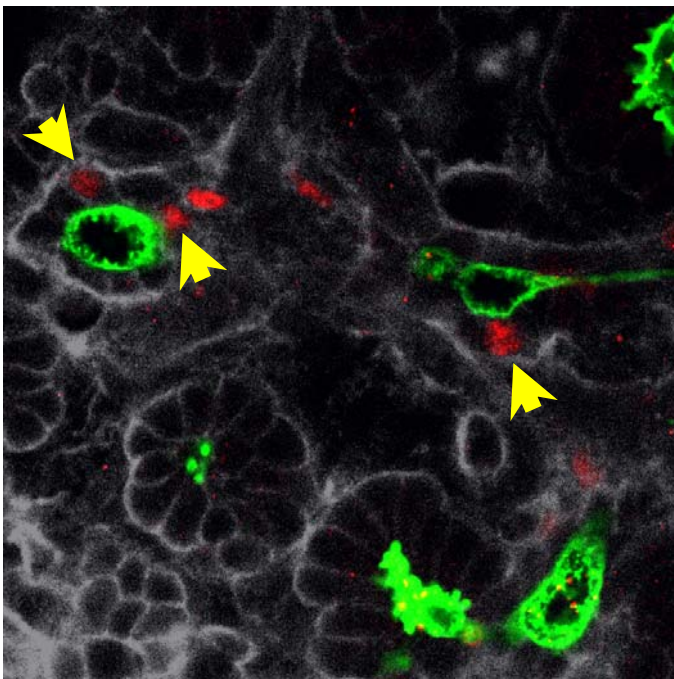

Muc1 Ngn3 E-cad

Figure 9s

A

Ngn3 +/- ; Rosa YFP + (no CRE)

Ngn3 +/- ; Rosa YFP + ; Ngn3-CRE +

Dbp Yfp  
Insulin Amylase

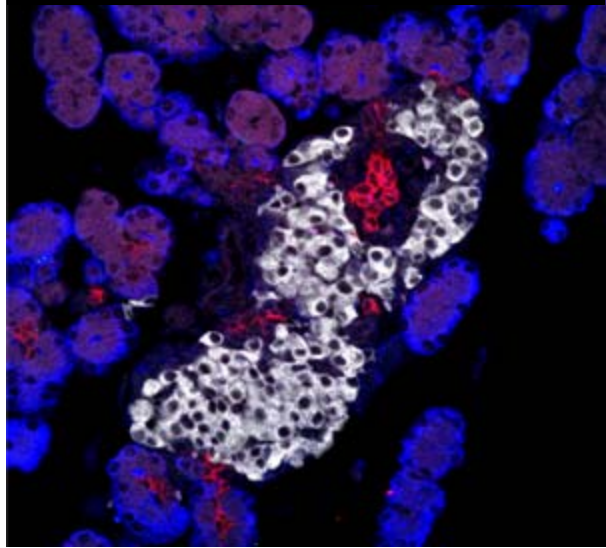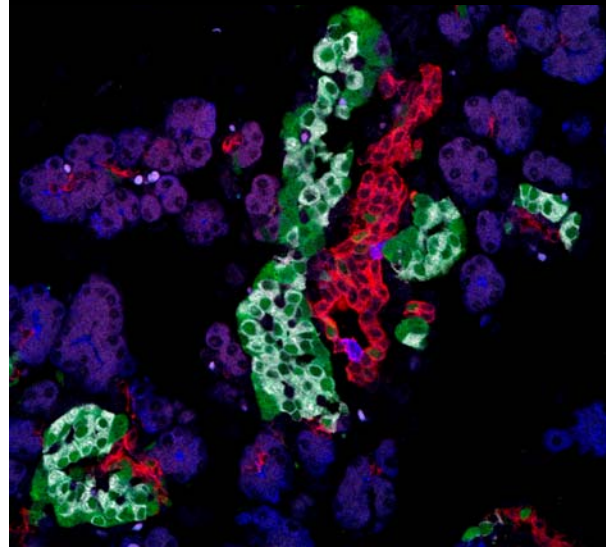

Ngn3 +/- ; YFP +/-

Ngn3 -/- ; YFP +/-

B

Muc1  
Yfp

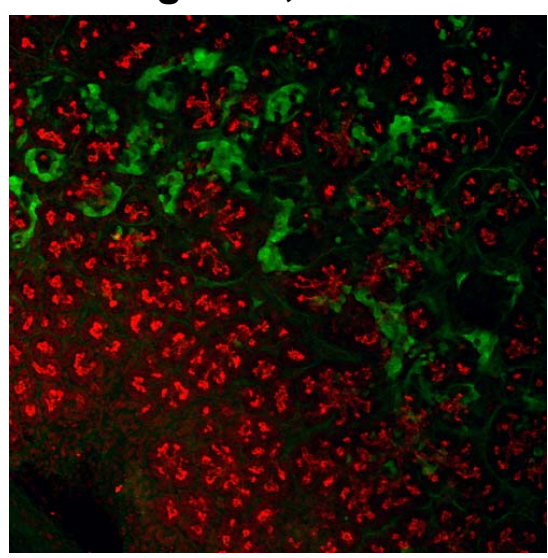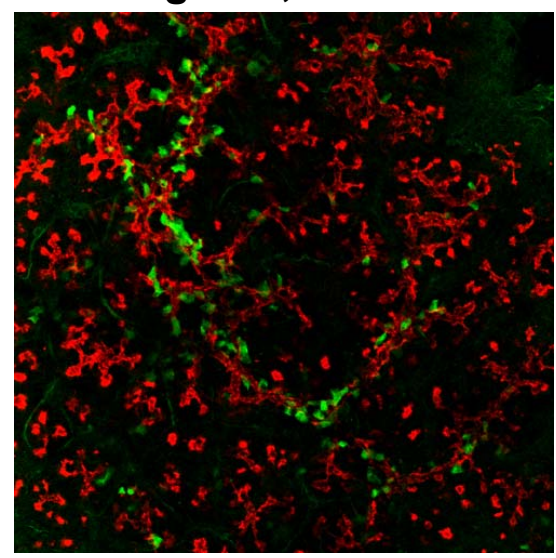

Amylase  
Yfp  
Muc1

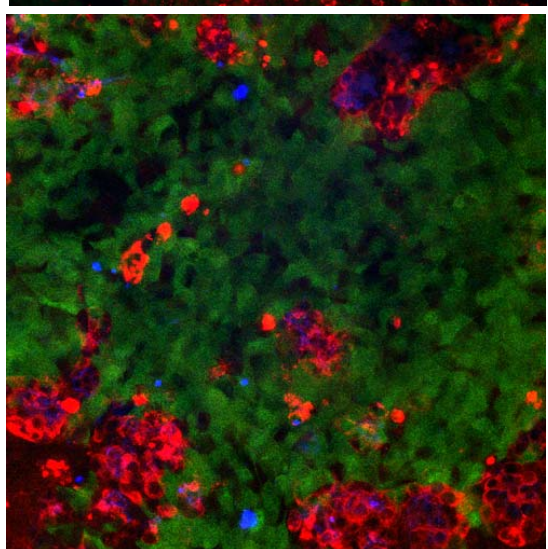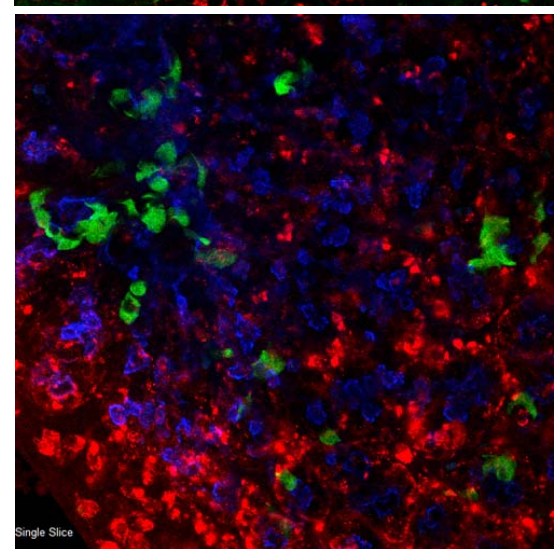

Figure 10s

**A**

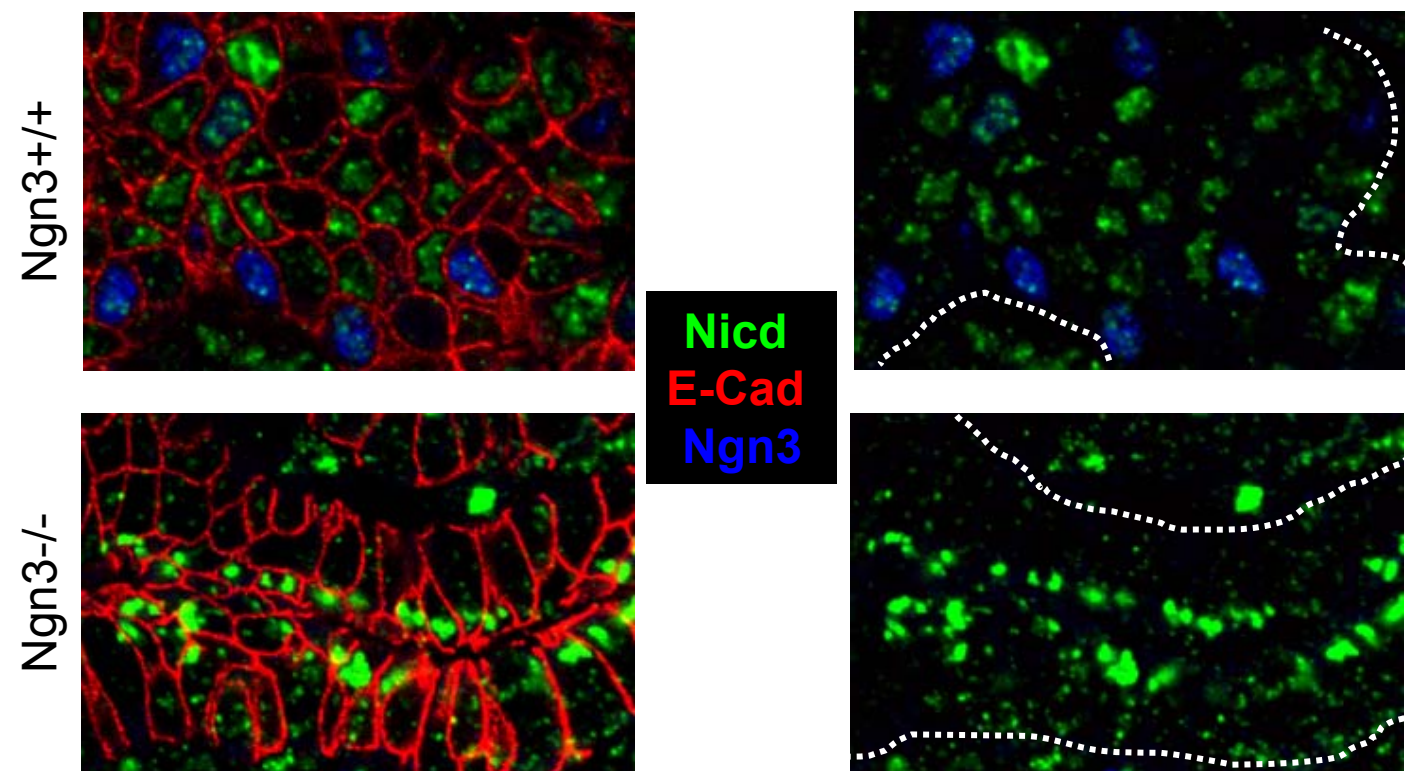

**B**

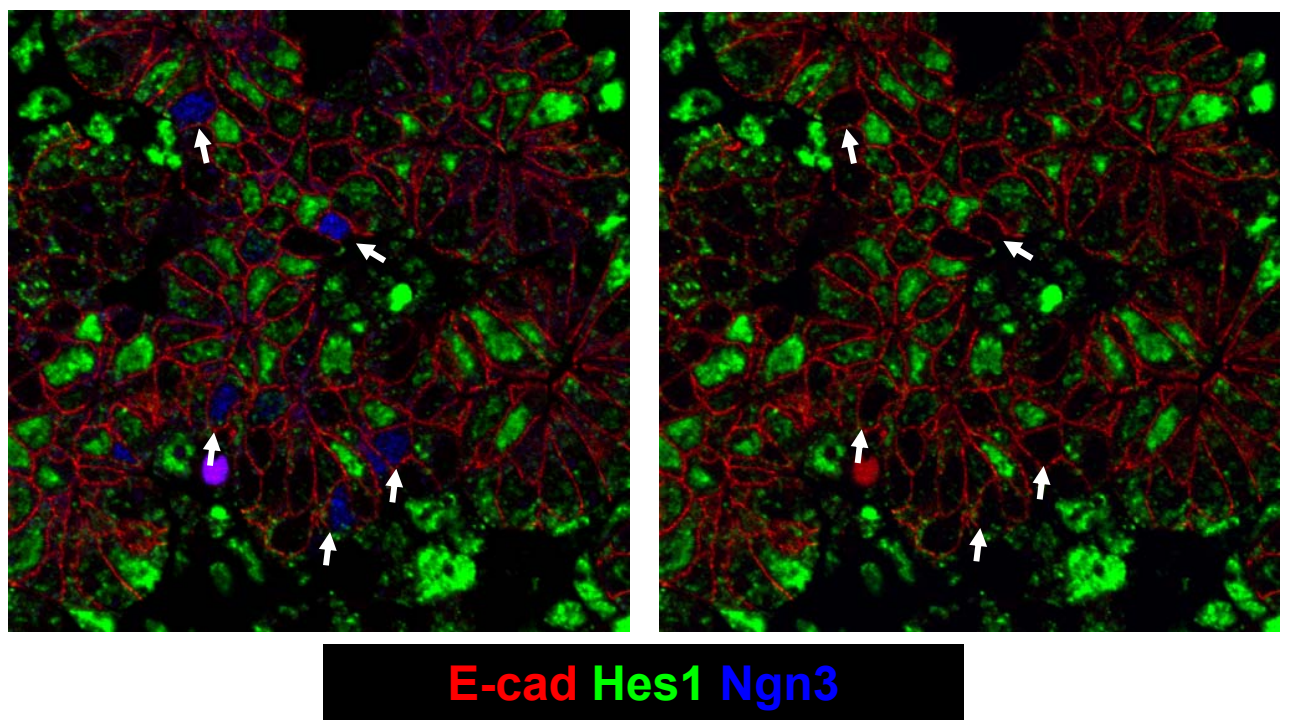

Figure 10s

C

Single NICD

Pdx-CRE+; NICD+

E-cad NICD

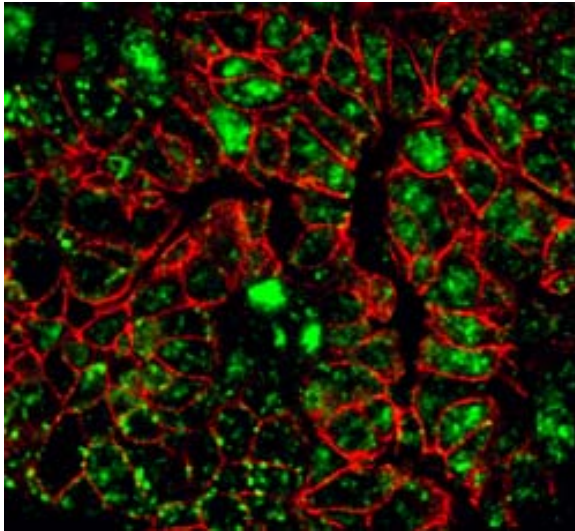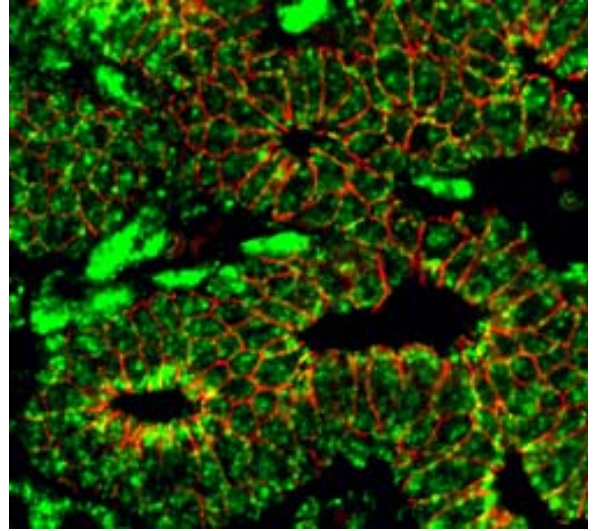

E-cad Hes1

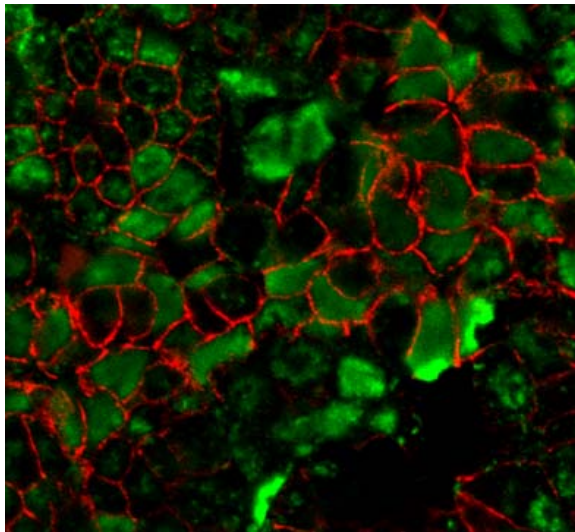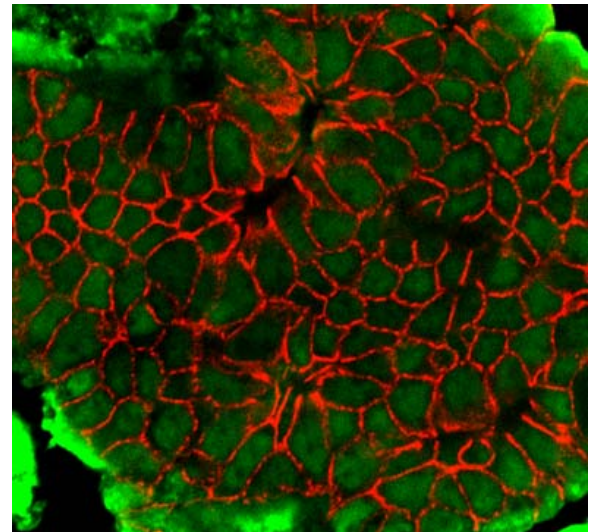



Figure 11s

**Ngn3<sup>+/+</sup>; Ngn3-CRE<sup>+/-</sup>; YFP<sup>+/-</sup>**

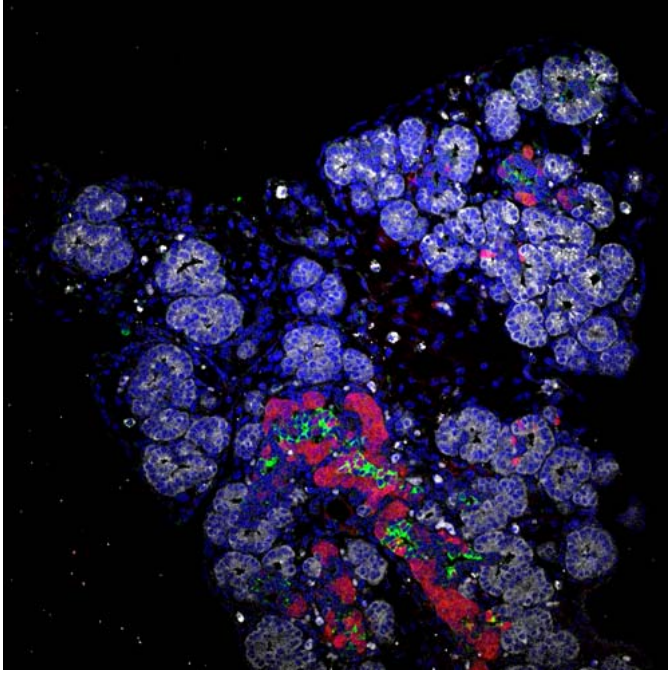

**Ngn3<sup>-/-</sup>; Ngn3-CRE<sup>+/-</sup>; YFP<sup>+/-</sup>**

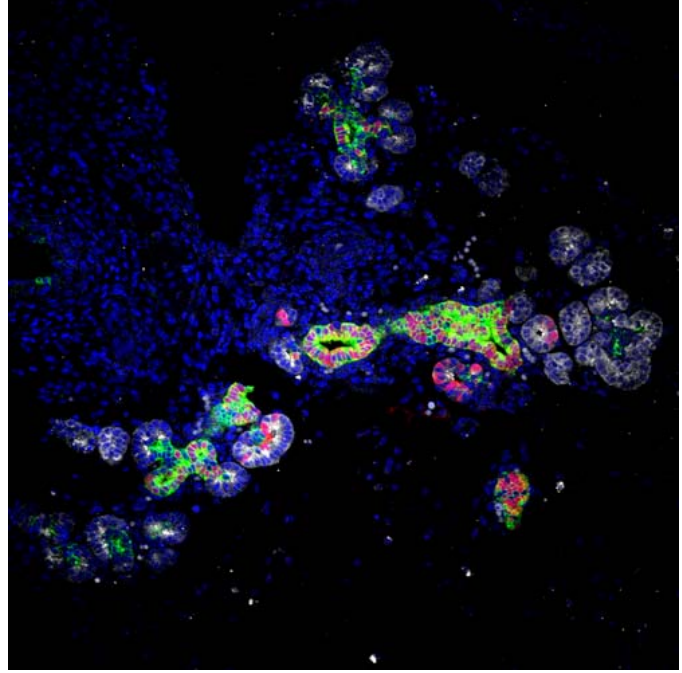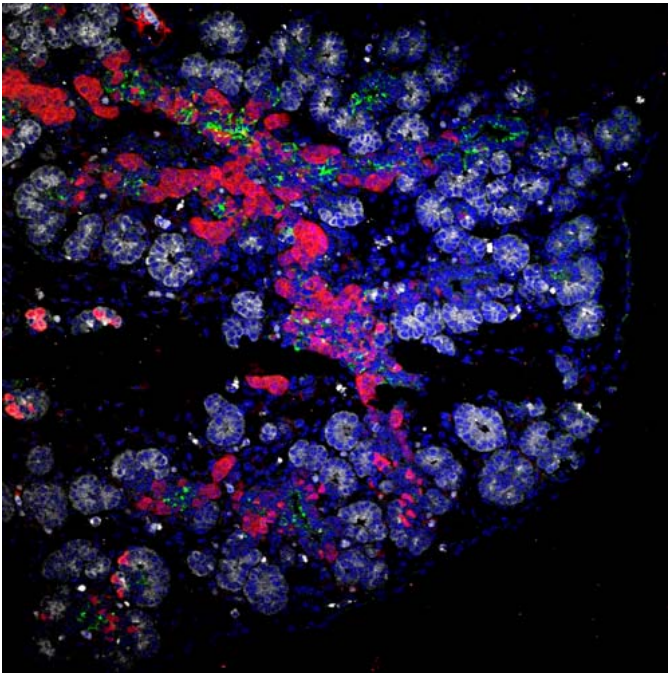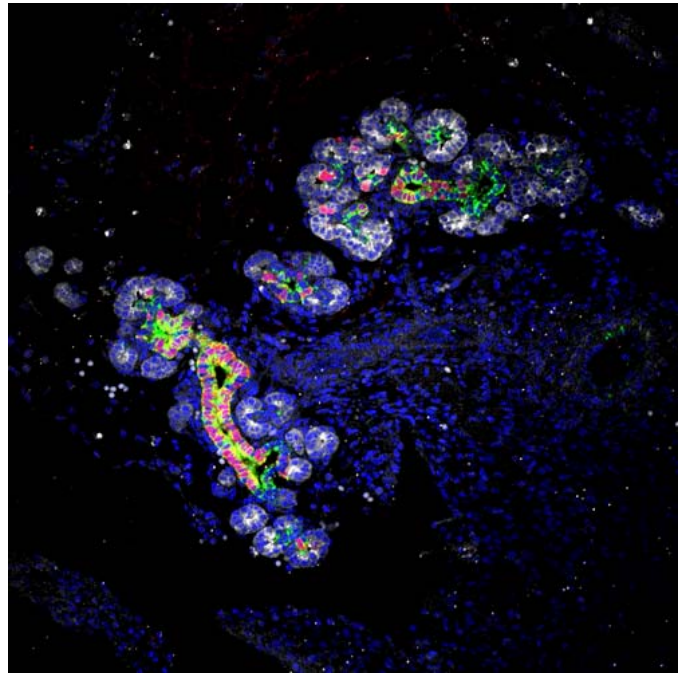

**Cpa1 DbpA Yfp Nuclei**
